# Supplementary material for: Impact of Aging on the Strength of Cardiovascular Risk Factors: A Longitudinal Study Over 40 Years
Source: PubMed Central journal article supplement — J Am Heart Assoc. 2018 Jan 6;7(1):e007061. doi: 10.1161/JAHA.117.007061 (PMC5778963; doi:10.1161/jaha.117.007061), 2018-01-06

# **SUPPLEMENTAL MATERIAL**

**Table S1.** ANOVA table for the total model regarding risk of myocardial infarction.

| Variable           | Degrees of freedom | Chi-square | p-value |
|--------------------|--------------------|------------|---------|
| Age                | 12                 | 124.12     | <0.0001 |
| <i>non linear</i>  | 1                  | 2.11       | 0.1464  |
| BMI                | 2                  | 8.33       | 0.0155  |
| <i>interaction</i> | 1                  | 5.39       | 0.0203  |
| LDL                | 2                  | 35.09      | <0.0001 |
| <i>interaction</i> | 1                  | 0.84       | 0.3582  |
| HDL                | 2                  | 10.91      | 0.0043  |
| <i>interaction</i> | 1                  | 0.84       | 0.3582  |
| SBP                | 2                  | 8.69       | 0.013   |
| <i>interaction</i> | 1                  | 0.62       | 0.4326  |
| DBP                | 2                  | 0.96       | 0.6175  |
| <i>interaction</i> | 1                  | 0.9        | 0.3427  |
| Triglycerides      | 2                  | 0.85       | 0.6541  |
| <i>interaction</i> | 1                  | 0.03       | 0.8516  |
| Glucose            | 2                  | 21.47      | <0.0001 |
| <i>interaction</i> | 1                  | 1.14       | 0.2851  |
| Smoking            | 2                  | 40.06      | <0.0001 |
| <i>interaction</i> | 1                  | 4.97       | 0.0258  |
| Total interaction  | 8                  | 23.03      | 0.0033  |
| Total              | 20                 | 227        | <0.0001 |

BMI=Body mass index, SBP=Systolic blood pressure, LDL=Low density lipoprotein, HDL=High density lipoprotein

**Table S2.** Rate ratios (RR), 95% CI and p-values for the associations between traditional risk factors and incident myocardial infarction (MI), adjusted for medication use, given when the risk factors were measured at five examination cycles (50, 60, 70, 77, and 82 years). The RRs are based on an interquartile range (IQR) change in each continuous risk factor during a 5 year follow-up from each examination.

| Variable             | RR   | 95% CI Upper | 95% CI Lower | p-value |
|----------------------|------|--------------|--------------|---------|
| <b>BMI</b>           |      |              |              |         |
| 50                   | 1.44 | 1.12         | 1.83         | 0.004   |
| 60                   | 1.25 | 1.08         | 1.45         | 0.004   |
| 70                   | 1.08 | 0.96         | 1.22         | 0.185   |
| 77                   | 0.98 | 0.84         | 1.16         | 0.844   |
| 82                   | 0.92 | 0.74         | 1.13         | 0.422   |
|                      |      |              |              |         |
| <b>LDL</b>           |      |              |              |         |
| 50                   | 1.24 | 0.98         | 1.55         | 0.068   |
| 60                   | 1.37 | 1.18         | 1.582        | <0.001  |
| 70                   | 1.51 | 1.31         | 1.738        | <0.001  |
| 77                   | 1.62 | 1.34         | 1.959        | <0.001  |
| 82                   | 1.70 | 1.35         | 2.160        | <0.001  |
|                      |      |              |              |         |
| <b>HDL</b>           |      |              |              |         |
| 50                   | 0.73 | 0.55         | 0.98         | 0.035   |
| 60                   | 0.77 | 0.64         | 0.922        | 0.005   |
| 70                   | 0.81 | 0.70         | 0.930        | 0.003   |
| 77                   | 0.84 | 0.70         | 1.004        | 0.055   |
| 82                   | 0.86 | 0.68         | 1.083        | 0.198   |
|                      |      |              |              |         |
| <b>SBP</b>           |      |              |              |         |
| 50                   | 1.24 | 0.86         | 1.81         | 0.252   |
| 60                   | 1.22 | 0.97         | 1.543        | 0.092   |
| 70                   | 1.20 | 1.02         | 1.411        | 0.026   |
| 77                   | 1.19 | 0.97         | 1.450        | 0.096   |
| 82                   | 1.18 | 0.91         | 1.525        | 0.222   |
|                      |      |              |              |         |
| <b>Triglycerides</b> |      |              |              |         |
| 50                   | 1.03 | 0.95         | 1.13         | 0.468   |
| 60                   | 1.03 | 0.97         | 1.094        | 0.302   |
| 70                   | 1.03 | 0.95         | 1.120        | 0.501   |
| 77                   | 1.03 | 0.91         | 1.159        | 0.654   |
| 82                   | 1.03 | 0.88         | 1.192        | 0.726   |
|                      |      |              |              |         |

|                |      |      |       |        |
|----------------|------|------|-------|--------|
| <b>Glucose</b> |      |      |       |        |
| 50             | 1.18 | 1.04 | 1.34  | 0.011  |
| 60             | 1.12 | 1.04 | 1.209 | 0.003  |
| 70             | 1.07 | 1.01 | 1.130 | 0.020  |
| 77             | 1.03 | 0.96 | 1.116 | 0.417  |
| 82             | 1.01 | 0.91 | 1.116 | 0.881  |
|                |      |      |       |        |
| <b>Smoking</b> |      |      |       |        |
| 50             | 3.15 | 2.03 | 4.88  | <0.001 |
| 60             | 2.35 | 1.81 | 3.045 | <0.001 |
| 70             | 1.76 | 1.44 | 2.150 | <0.001 |
| 77             | 1.43 | 1.08 | 1.907 | 0.014  |
| 82             | 1.24 | 0.85 | 1.804 | 0.265  |

**Table S3.** ANOVA table for the total model regarding risk of ischemic stroke.

| Variable           | Degrees of freedom | Chi-square | p-value |
|--------------------|--------------------|------------|---------|
| Age                | 12                 | 156.4      | <0.0001 |
| <i>non linear</i>  | 1                  | 7.38       | 0.0066  |
| BMI                | 2                  | 1.02       | 0.6013  |
| <i>interaction</i> | 1                  | 1.01       | 0.3138  |
| LDL                | 2                  | 6.87       | 0.0322  |
| <i>interaction</i> | 1                  | 0.36       | 0.548   |
| HDL                | 2                  | 3.88       | 0.1435  |
| <i>interaction</i> | 1                  | 1.42       | 0.2329  |
| SBP                | 2                  | 25.39      | <0.0001 |
| <i>interaction</i> | 1                  | 7.36       | 0.0067  |
| DBP                | 2                  | 1.25       | 0.5354  |
| <i>interaction</i> | 1                  | 0.65       | 0.4199  |
| Triglycerides      | 2                  | 0.56       | 0.7549  |
| <i>interaction</i> | 1                  | 0.05       | 0.8205  |
| Glucose            | 2                  | 9.51       | 0.0086  |
| <i>interaction</i> | 1                  | 0.6        | 0.4392  |
| Smoking            | 2                  | 6.76       | 0.0341  |
| <i>interaction</i> | 1                  | 0.6        | 0.4392  |
| Total interaction  | 8                  | 17.51      | 0.0252  |
| Total              | 20                 | 218.91     | <0.0001 |

BMI=Body mass index, SBP=Systolic blood pressure, LDL=Low density lipoprotein, HDL=High density lipoprotein

**Table S4.** Rate ratios (RR), 95% CI and p-values for the associations between traditional risk factors and incident ischemic stroke, adjusted for medication use, given when the risk factors were measured at five examination cycles (50, 60, 70, 77, and 82 years). The RRs are based on an interquartile range (IQR) change in each continuous risk factor during a 5 year follow-up from each examination.

| Variable             | RR   | 95% CI Upper | 95% CI Lower | p-value |
|----------------------|------|--------------|--------------|---------|
| <b>BMI</b>           |      |              |              |         |
| 50                   | 1.49 | 0.91         | 2.44         | 0.112   |
| 60                   | 1.26 | 0.92         | 1.72         | 0.147   |
| 70                   | 1.06 | 0.90         | 1.26         | 0.488   |
| 77                   | 0.94 | 0.80         | 1.11         | 0.483   |
| 82                   | 0.87 | 0.69         | 1.08         | 0.205   |
|                      |      |              |              |         |
| <b>LDL</b>           |      |              |              |         |
| 50                   | 0.98 | 0.56         | 1.73         | 0.957   |
| 60                   | 1.10 | 0.77         | 1.58         | 0.588   |
| 70                   | 1.24 | 1.01         | 1.52         | 0.041   |
| 77                   | 1.34 | 1.10         | 1.64         | 0.004   |
| 82                   | 1.42 | 1.10         | 1.85         | 0.008   |
|                      |      |              |              |         |
| <b>HDL</b>           |      |              |              |         |
| 50                   | 1.15 | 0.70         | 1.88         | 0.582   |
| 60                   | 1.03 | 0.75         | 1.40         | 0.868   |
| 70                   | 0.92 | 0.77         | 1.10         | 0.348   |
| 77                   | 0.85 | 0.71         | 1.02         | 0.081   |
| 82                   | 0.80 | 0.63         | 1.02         | 0.077   |
|                      |      |              |              |         |
| <b>SBP</b>           |      |              |              |         |
| 50                   | 2.85 | 1.52         | 5.32         | 0.001   |
| 60                   | 2.11 | 1.42         | 3.14         | <0.001  |
| 70                   | 1.57 | 1.26         | 1.94         | <0.001  |
| 77                   | 1.27 | 1.04         | 1.55         | 0.019   |
| 82                   | 1.10 | 0.84         | 1.43         | 0.508   |
|                      |      |              |              |         |
| <b>Triglycerides</b> |      |              |              |         |
| 50                   | 0.85 | 0.56         | 1.28         | 0.440   |
| 60                   | 0.88 | 0.68         | 1.15         | 0.348   |
| 70                   | 0.92 | 0.79         | 1.06         | 0.236   |
| 77                   | 0.94 | 0.82         | 1.09         | 0.405   |
| 82                   | 0.96 | 0.79         | 1.16         | 0.668   |
|                      |      |              |              |         |

|                |      |      |      |       |
|----------------|------|------|------|-------|
| <b>Glucose</b> |      |      |      |       |
| 50             | 1.05 | 0.83 | 1.32 | 0.679 |
| 60             | 1.04 | 0.90 | 1.20 | 0.579 |
| 70             | 1.03 | 0.96 | 1.11 | 0.416 |
| 77             | 1.03 | 0.94 | 1.12 | 0.554 |
| 82             | 1.02 | 0.91 | 1.15 | 0.725 |
|                |      |      |      |       |
| <b>Smoking</b> |      |      |      |       |
| 50             | 3.15 | 1.35 | 7.34 | 0.008 |
| 60             | 2.04 | 1.22 | 3.41 | 0.007 |
| 70             | 1.32 | 1.00 | 1.75 | 0.051 |
| 77             | 0.97 | 0.70 | 1.35 | 0.878 |
| 82             | 0.78 | 0.50 | 1.24 | 0.299 |

**Table S5.** ANOVA table for the total model regarding risk of heart failure.

| Variable           | Degrees of freedom | Chi-square | p-value |
|--------------------|--------------------|------------|---------|
| Age                | 12                 | 193.59     | <0.0001 |
| <i>non linear</i>  | 1                  | 10.78      | 0.001   |
| BMI                | 2                  | 23.32      | <0.0001 |
| <i>interaction</i> | 1                  | 0.57       | 0.4492  |
| LDL                | 2                  | 1.79       | 0.409   |
| <i>interaction</i> | 1                  | 0.05       | 0.8294  |
| HDL                | 2                  | 8.31       | 0.0157  |
| <i>interaction</i> | 1                  | 5.79       | 0.0161  |
| SBP                | 2                  | 18.69      | <0.0001 |
| <i>interaction</i> | 1                  | 8.07       | 0.0045  |
| DBP                | 2                  | 0.78       | 0.6766  |
| <i>interaction</i> | 1                  | 0.01       | 0.9314  |
| Triglycerides      | 2                  | 0.51       | 0.773   |
| <i>interaction</i> | 1                  | 0.51       | 0.4767  |
| Glucose            | 2                  | 17.15      | 0.0002  |
| <i>interaction</i> | 1                  | 0.03       | 0.8739  |
| Smoking            | 2                  | 7.95       | 0.0188  |
| <i>interaction</i> | 1                  | 0.32       | 0.5709  |
| Total interaction  | 8                  | 27.1       | 0.0007  |
| Total              | 20                 | 292.59     | <0.0001 |

BMI=Body mass index, SBP=Systolic blood pressure, LDL=Low density lipoprotein, HDL=High density lipoprotein



**Table S6.** Rate ratios (RR), 95% CI and p-values for the associations between traditional risk factors and incident heart failure, adjusted for medication use, given when the risk factors were measured at five examination cycles (50, 60, 70, 77, and 82 years). The RRs are based on an interquartile range (IQR) change in each continuous risk factor during a 5 year follow-up from each examination.

| Variable             | RR   | 95% CI Upper | 95% CI Lower | p-value |
|----------------------|------|--------------|--------------|---------|
| <b>BMI</b>           |      |              |              |         |
| 50                   | 1.56 | 1.01         | 2.40         | 0.043   |
| 60                   | 1.47 | 1.11         | 1.93         | 0.007   |
| 70                   | 1.38 | 1.18         | 1.60         | <0.001  |
| 77                   | 1.32 | 1.15         | 1.51         | <0.001  |
| 82                   | 1.28 | 1.07         | 1.53         | 0.008   |
|                      |      |              |              |         |
| <b>LDL</b>           |      |              |              |         |
| 50                   | 1.27 | 0.79         | 2.07         | 0.326   |
| 60                   | 1.23 | 0.90         | 1.68         | 0.198   |
| 70                   | 1.19 | 0.98         | 1.43         | 0.073   |
| 77                   | 1.16 | 0.97         | 1.39         | 0.113   |
| 82                   | 1.14 | 0.90         | 1.43         | 0.272   |
|                      |      |              |              |         |
| <b>HDL</b>           |      |              |              |         |
| 50                   | 0.49 | 0.28         | 0.86         | 0.013   |
| 60                   | 0.62 | 0.42         | 0.90         | 0.011   |
| 70                   | 0.78 | 0.63         | 0.95         | 0.016   |
| 77                   | 0.91 | 0.78         | 1.07         | 0.262   |
| 82                   | 1.03 | 0.85         | 1.25         | 0.785   |
|                      |      |              |              |         |
| <b>SBP</b>           |      |              |              |         |
| 50                   | 2.36 | 1.28         | 4.35         | 0.006   |
| 60                   | 1.82 | 1.22         | 2.71         | 0.003   |
| 70                   | 1.40 | 1.12         | 1.74         | 0.003   |
| 77                   | 1.17 | 0.97         | 1.40         | 0.096   |
| 82                   | 1.02 | 0.81         | 1.29         | 0.836   |
|                      |      |              |              |         |
| <b>Triglycerides</b> |      |              |              |         |
| 50                   | 1.05 | 0.89         | 1.24         | 0.572   |
| 60                   | 1.02 | 0.91         | 1.13         | 0.760   |
| 70                   | 0.99 | 0.90         | 1.08         | 0.757   |
| 77                   | 0.96 | 0.86         | 1.09         | 0.544   |
| 82                   | 0.95 | 0.82         | 1.10         | 0.488   |
|                      |      |              |              |         |

|                |      |      |      |       |
|----------------|------|------|------|-------|
| <b>Glucose</b> |      |      |      |       |
| 50             | 1.06 | 0.85 | 1.30 | 0.617 |
| 60             | 1.07 | 0.93 | 1.22 | 0.338 |
| 70             | 1.08 | 1.01 | 1.16 | 0.033 |
| 77             | 1.09 | 1.02 | 1.16 | 0.014 |
| 82             | 1.09 | 1.00 | 1.20 | 0.059 |
|                |      |      |      |       |
| <b>Smoking</b> |      |      |      |       |
| 50             | 1.93 | 0.87 | 4.29 | 0.106 |
| 60             | 1.73 | 1.05 | 2.85 | 0.032 |
| 70             | 1.55 | 1.18 | 2.03 | 0.001 |
| 77             | 1.44 | 1.09 | 1.89 | 0.009 |
| 82             | 1.36 | 0.94 | 1.97 | 0.103 |

**Table S7.** Risk ratios (RR) and 95% CI (lower and upper) are given for relationships between different risk factors and incident myocardial infarction, ischemic stroke and heart failure at ages 50, 60, 70, 77 and 82 years of age when recalculated using multiple imputation for missing variables. SBP= systolic blood pressure.

| Variable             | Myocardial infarction |       |       | Stroke |       |       | Heart failure |       |       |
|----------------------|-----------------------|-------|-------|--------|-------|-------|---------------|-------|-------|
|                      | RR                    | Lower | Upper | RR     | Lower | Upper | RR            | Lower | Upper |
| <b>BMI</b>           |                       |       |       |        |       |       |               |       |       |
| 50                   | 1.31                  | 1.02  | 1.67  | 1.28   | 0.78  | 2.09  | 1.54          | 1.01  | 2.35  |
| 60                   | 1.18                  | 1.02  | 1.38  | 1.14   | 0.83  | 1.56  | 1.44          | 1.10  | 1.89  |
| 70                   | 1.07                  | 0.95  | 1.21  | 1.02   | 0.86  | 1.21  | 1.35          | 1.16  | 1.57  |
| 77                   | 1.00                  | 0.85  | 1.17  | 0.94   | 0.80  | 1.10  | 1.29          | 1.13  | 1.48  |
| 82                   | 0.95                  | 0.77  | 1.17  | 0.89   | 0.71  | 1.10  | 1.25          | 1.05  | 1.49  |
| <b>LDL</b>           |                       |       |       |        |       |       |               |       |       |
| 50                   | 1.36                  | 1.02  | 1.81  | 1.13   | 0.61  | 2.09  | 0.92          | 0.53  | 1.62  |
| 60                   | 1.45                  | 1.18  | 1.77  | 1.22   | 0.82  | 1.81  | 0.97          | 0.67  | 1.40  |
| 70                   | 1.54                  | 1.26  | 1.88  | 1.31   | 1.03  | 1.66  | 1.03          | 0.83  | 1.28  |
| 77                   | 1.61                  | 1.25  | 2.06  | 1.38   | 1.08  | 1.75  | 1.07          | 0.87  | 1.31  |
| 82                   | 1.66                  | 1.23  | 2.24  | 1.43   | 1.05  | 1.93  | 1.09          | 0.85  | 1.41  |
| <b>HDL</b>           |                       |       |       |        |       |       |               |       |       |
| 50                   | 0.77                  | 0.56  | 1.06  | 1.07   | 0.63  | 1.82  | 0.65          | 0.33  | 1.27  |
| 60                   | 0.81                  | 0.66  | 0.99  | 0.97   | 0.69  | 1.37  | 0.74          | 0.47  | 1.17  |
| 70                   | 0.85                  | 0.72  | 1.00  | 0.88   | 0.71  | 1.08  | 0.85          | 0.66  | 1.11  |
| 77                   | 0.88                  | 0.72  | 1.08  | 0.82   | 0.66  | 1.02  | 0.94          | 0.78  | 1.12  |
| 82                   | 0.90                  | 0.70  | 1.16  | 0.78   | 0.60  | 1.03  | 1.00          | 0.82  | 1.22  |
| <b>SBP</b>           |                       |       |       |        |       |       |               |       |       |
| 50                   | 1.38                  | 0.96  | 1.98  | 3.28   | 1.82  | 5.90  | 2.16          | 1.21  | 3.88  |
| 60                   | 1.31                  | 1.05  | 1.64  | 2.31   | 1.59  | 3.36  | 1.74          | 1.19  | 2.54  |
| 70                   | 1.24                  | 1.07  | 1.45  | 1.63   | 1.33  | 2.00  | 1.40          | 1.13  | 1.72  |
| 77                   | 1.20                  | 0.99  | 1.46  | 1.28   | 1.05  | 1.55  | 1.20          | 1.01  | 1.42  |
| 82                   | 1.17                  | 0.91  | 1.51  | 1.07   | 0.83  | 1.39  | 1.07          | 0.86  | 1.34  |
| <b>Triglycerides</b> |                       |       |       |        |       |       |               |       |       |
| 50                   | 1.04                  | 0.93  | 1.16  | 0.86   | 0.56  | 1.33  | 1.09          | 0.90  | 1.31  |
| 60                   | 1.05                  | 0.97  | 1.13  | 0.88   | 0.66  | 1.17  | 1.04          | 0.92  | 1.18  |
| 70                   | 1.06                  | 0.95  | 1.17  | 0.90   | 0.76  | 1.07  | 1.00          | 0.90  | 1.11  |
| 77                   | 1.06                  | 0.91  | 1.24  | 0.91   | 0.77  | 1.08  | 0.97          | 0.85  | 1.11  |
| 82                   | 1.07                  | 0.88  | 1.29  | 0.92   | 0.74  | 1.15  | 0.95          | 0.81  | 1.12  |
| <b>Glucose</b>       |                       |       |       |        |       |       |               |       |       |
| 50                   | 1.14                  | 0.99  | 1.32  | 1.05   | 0.82  | 1.33  | 0.97          | 0.78  | 1.20  |
| 60                   | 1.10                  | 1.01  | 1.19  | 1.04   | 0.90  | 1.21  | 1.00          | 0.87  | 1.14  |

|         |      |      |      |      |      |      |      |      |      |
|---------|------|------|------|------|------|------|------|------|------|
| 70      | 1.05 | 0.99 | 1.12 | 1.03 | 0.95 | 1.12 | 1.03 | 0.96 | 1.11 |
| 77      | 1.02 | 0.94 | 1.11 | 1.03 | 0.95 | 1.12 | 1.05 | 0.99 | 1.13 |
| 82      | 1.00 | 0.90 | 1.12 | 1.03 | 0.91 | 1.15 | 1.07 | 0.98 | 1.17 |
|         |      |      |      |      |      |      |      |      |      |
| Smoking |      |      |      |      |      |      |      |      |      |
| 50      | 2.60 | 1.70 | 3.99 | 2.23 | 0.99 | 5.03 | 1.89 | 0.90 | 3.99 |
| 60      | 2.09 | 1.62 | 2.68 | 1.69 | 1.03 | 2.77 | 1.72 | 1.07 | 2.74 |
| 70      | 1.67 | 1.37 | 2.04 | 1.28 | 0.97 | 1.67 | 1.56 | 1.20 | 2.01 |
| 77      | 1.43 | 1.08 | 1.90 | 1.05 | 0.77 | 1.43 | 1.45 | 1.12 | 1.89 |
| 82      | 1.28 | 0.89 | 1.85 | 0.91 | 0.59 | 1.41 | 1.38 | 0.97 | 1.97 |

**Table S8.** RR (and 95% CI) and p-values for the associations between serum triglycerides and incident myocardial infarction, ischemic stroke and heart failure in models including serum triglycerides as the only risk factor (together with age) at ages 50, 60, 70, 77, and 82 years). The RR is based on an interquartile range (IQR) change in serum triglycerides.

| Outcome                      | RR   | 95% CI Upper | 95% CI Lower | p-value |
|------------------------------|------|--------------|--------------|---------|
| <b>Myocardial infarction</b> |      |              |              |         |
| 50                           | 1.11 | 1.06         | 1.18         | <0.001  |
| 60                           | 1.15 | 1.10         | 1.19         | <0.001  |
| 70                           | 1.18 | 1.11         | 1.25         | <0.001  |
| 77                           | 1.20 | 1.10         | 1.31         | <0.001  |
| 82                           | 1.22 | 1.09         | 1.36         | <0.001  |
|                              |      |              |              |         |
| <b>Stroke</b>                |      |              |              |         |
| 50                           | 1.09 | 0.91         | 1.30         | 0.346   |
| 60                           | 1.08 | 0.97         | 1.21         | 0.179   |
| 70                           | 1.07 | 0.98         | 1.18         | 0.143   |
| 77                           | 1.07 | 0.95         | 1.20         | 0.300   |
| 82                           | 1.06 | 0.91         | 1.23         | 0.442   |
|                              |      |              |              |         |
| <b>Heart failure</b>         |      |              |              |         |
| 50                           | 1.18 | 1.10         | 1.28         | <0.001  |
| 60                           | 1.16 | 1.10         | 1.23         | <0.001  |
| 70                           | 1.14 | 1.06         | 1.22         | 0.001   |
| 77                           | 1.12 | 1.02         | 1.24         | 0.022   |
| 82                           | 1.11 | 0.99         | 1.25         | 0.085   |

**Figure S1.** 3D graphs illustrating the impact of the different risk factors and age on the log incident rate of myocardial infarction. The p-values for the interaction term between those risk factors and age regarding myocardial infarction are given in the figures.

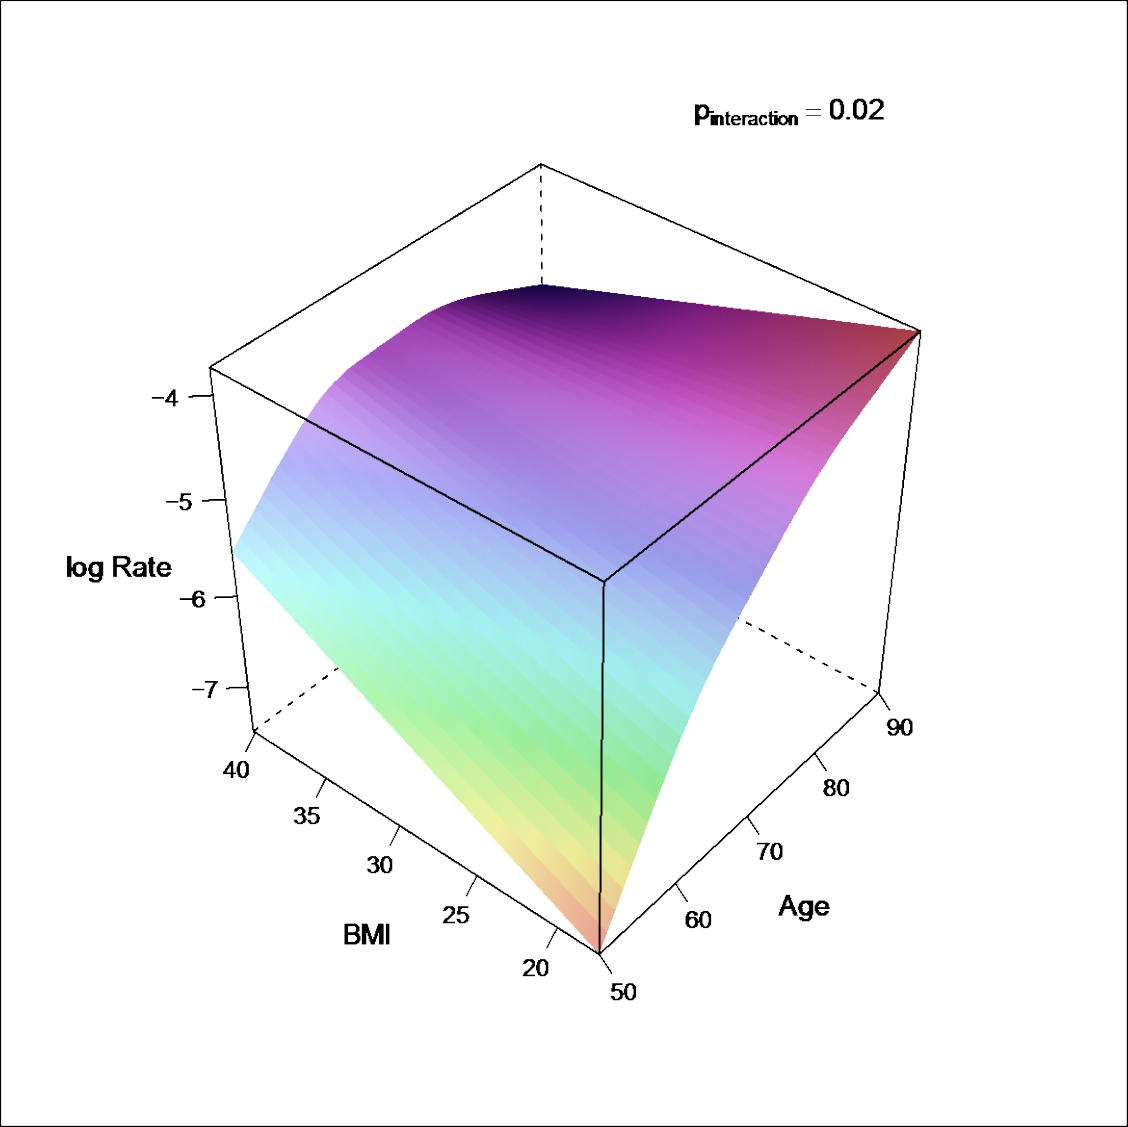

$P_{\text{interaction}} = 0.167$

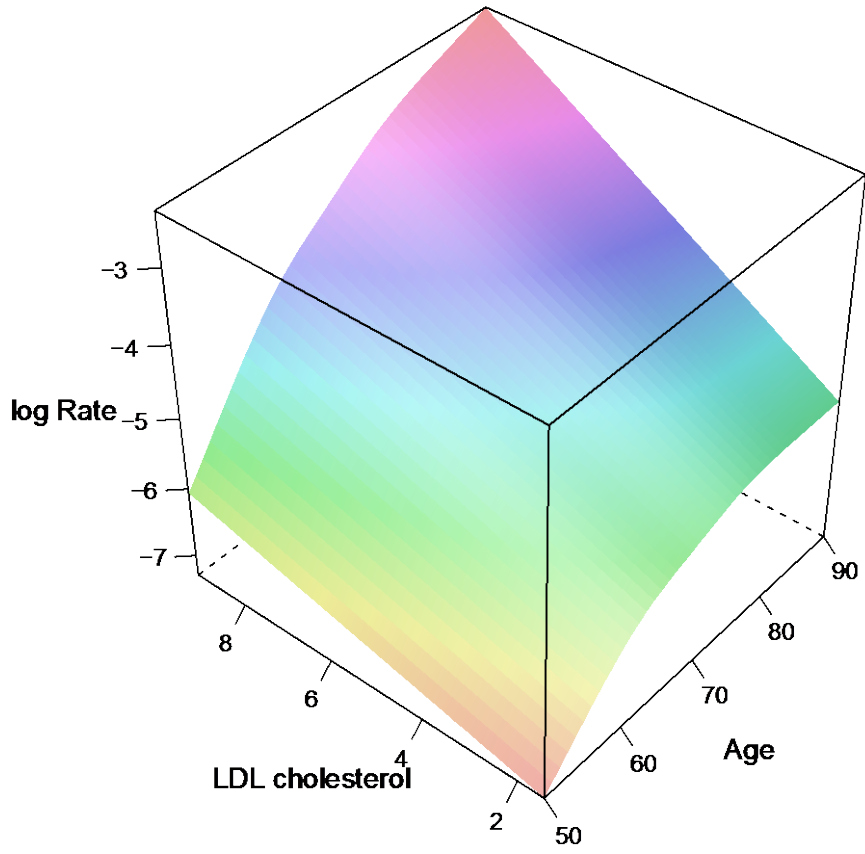

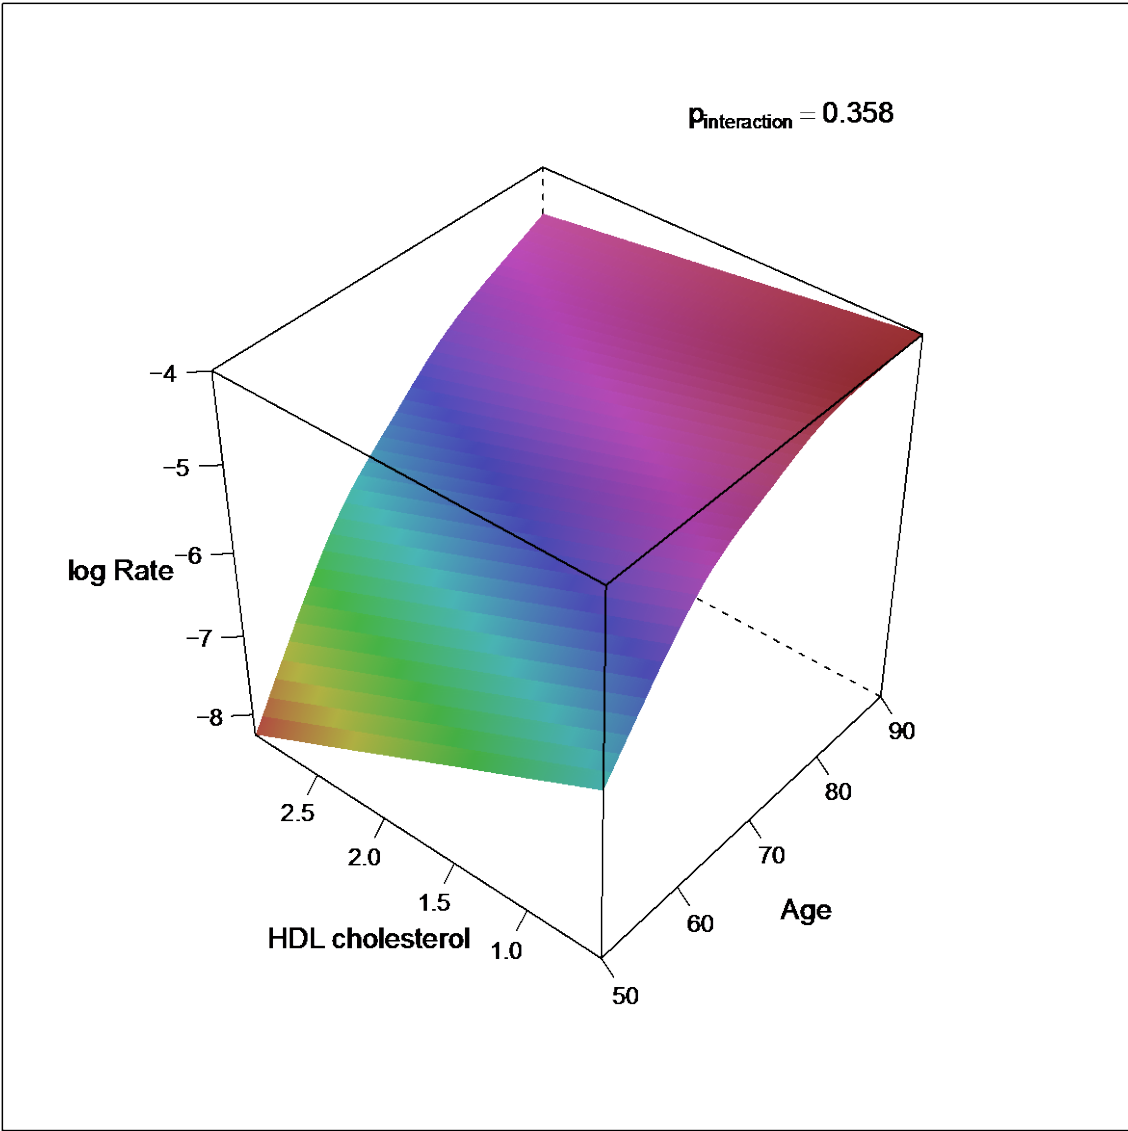



$P_{\text{interaction}} = 0.433$

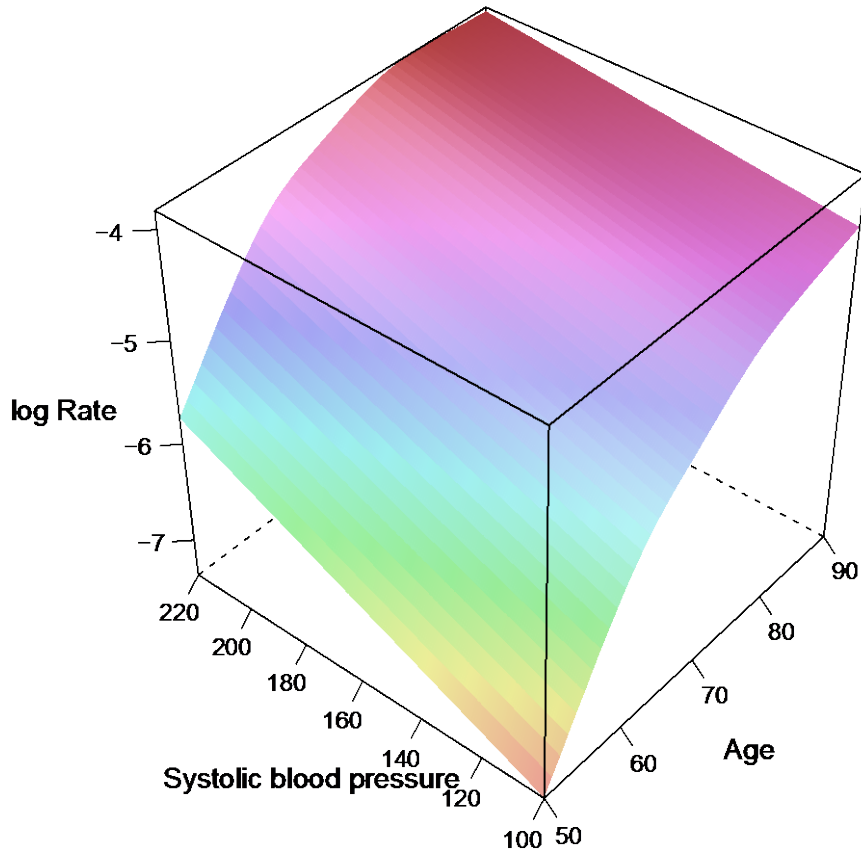

$P_{\text{interaction}} = 0.285$

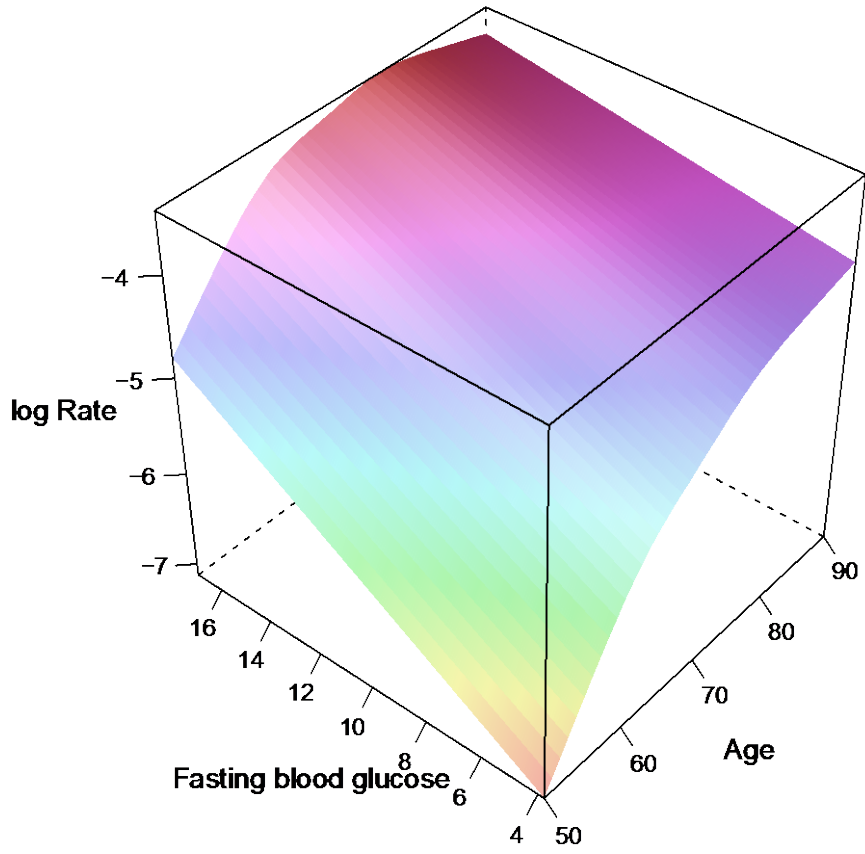

**Figure S2.** 3D graphs illustrating the impact of the different risk factors and age on the log incident rate of ischemic stroke. The p-values for the interaction term between those risk factors and age regarding myocardial infarction are given in the figures.

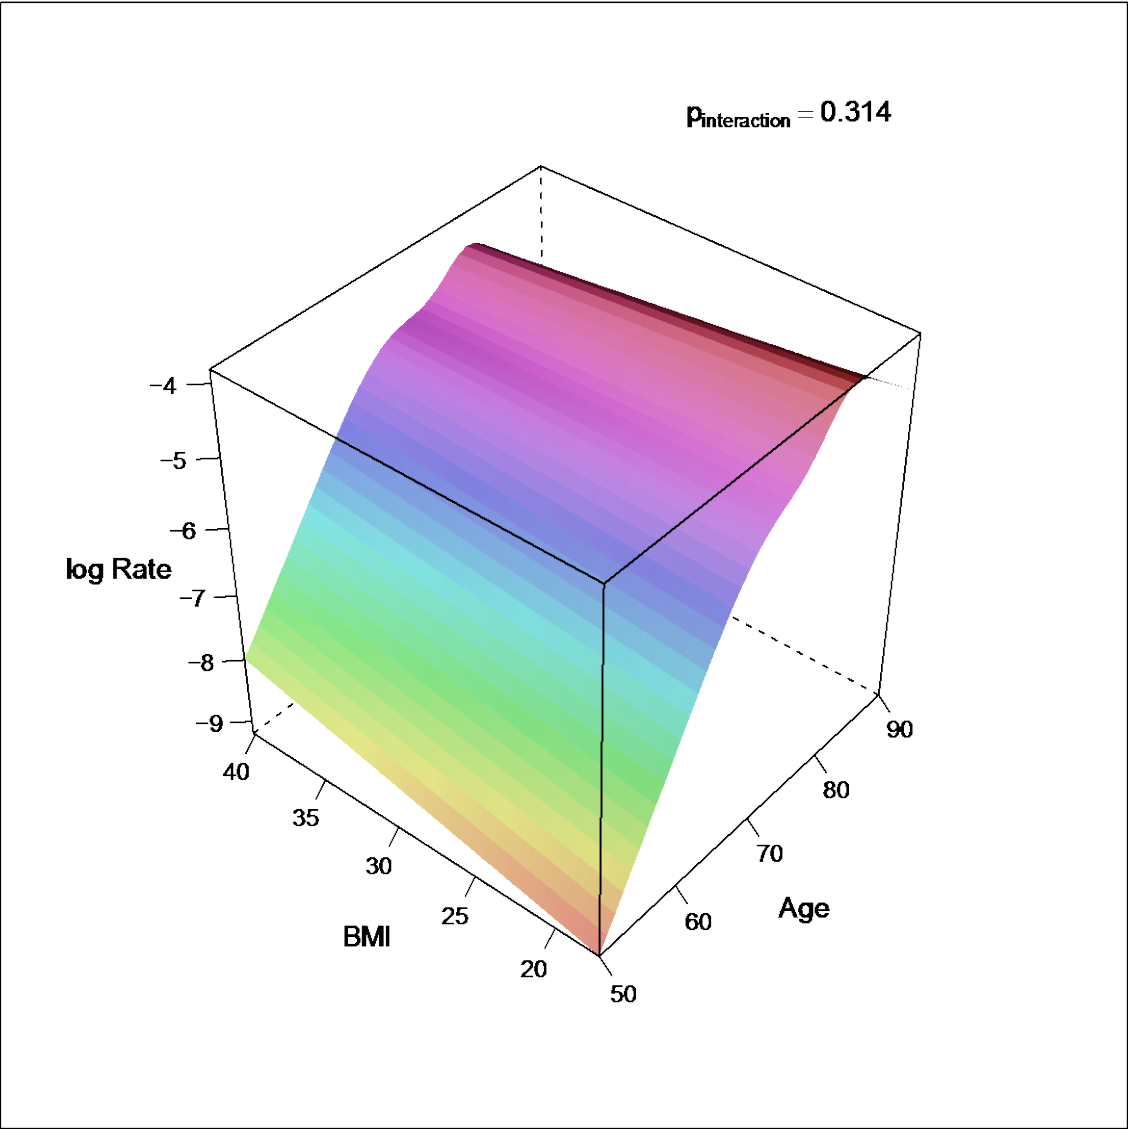

$P_{\text{interaction}} = 0.548$

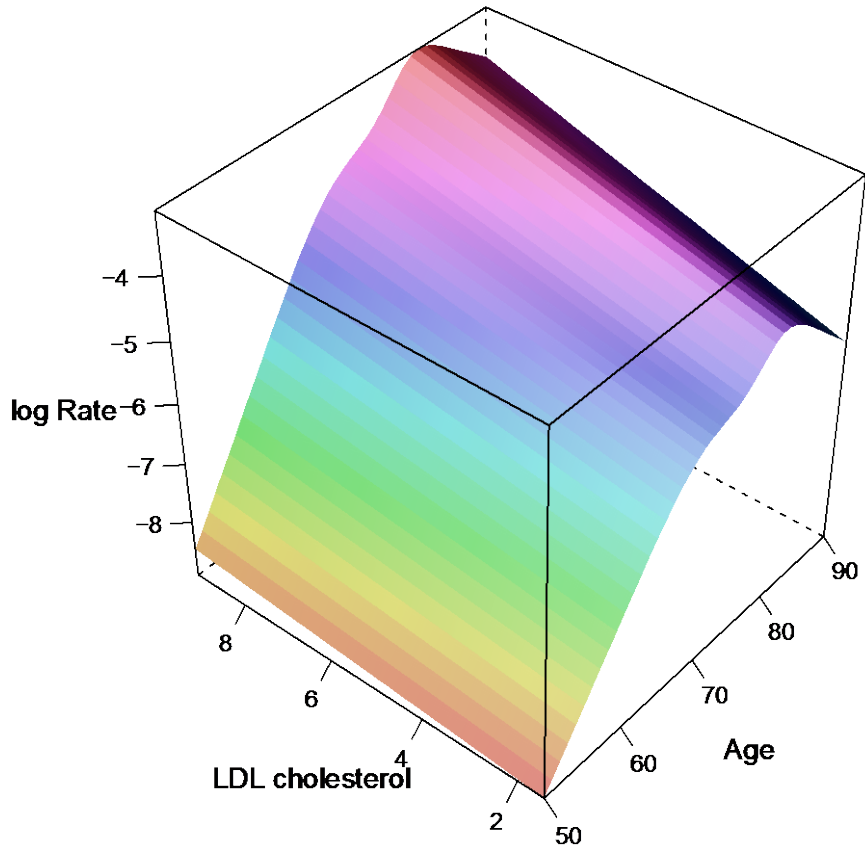

$P_{\text{interaction}} = 0.233$

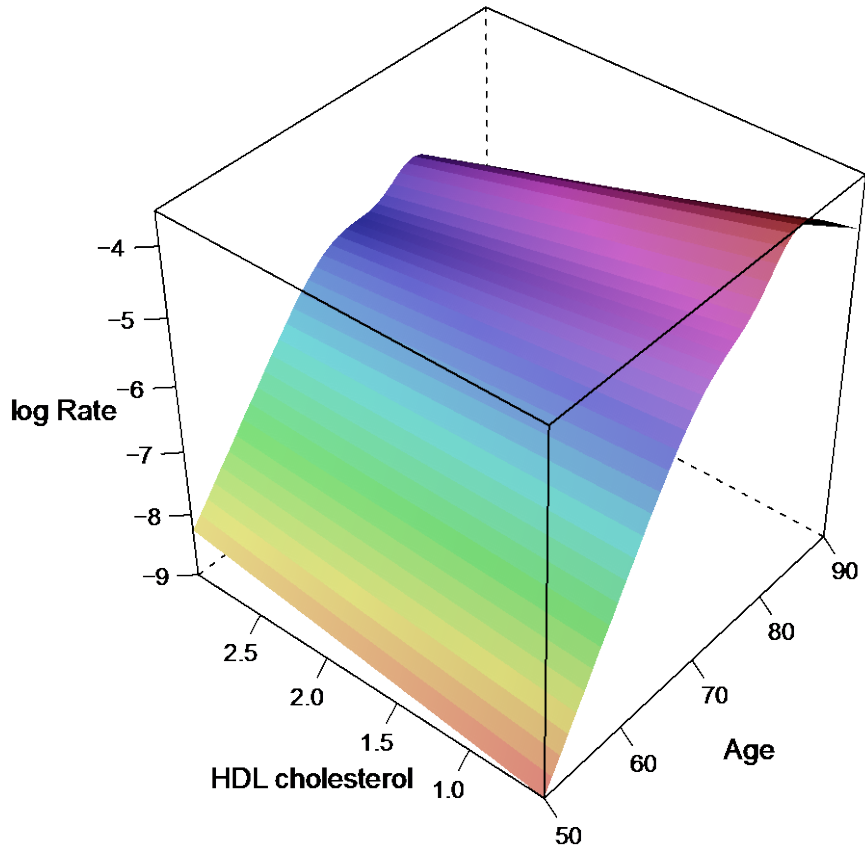

$P_{\text{interaction}} = 0.007$

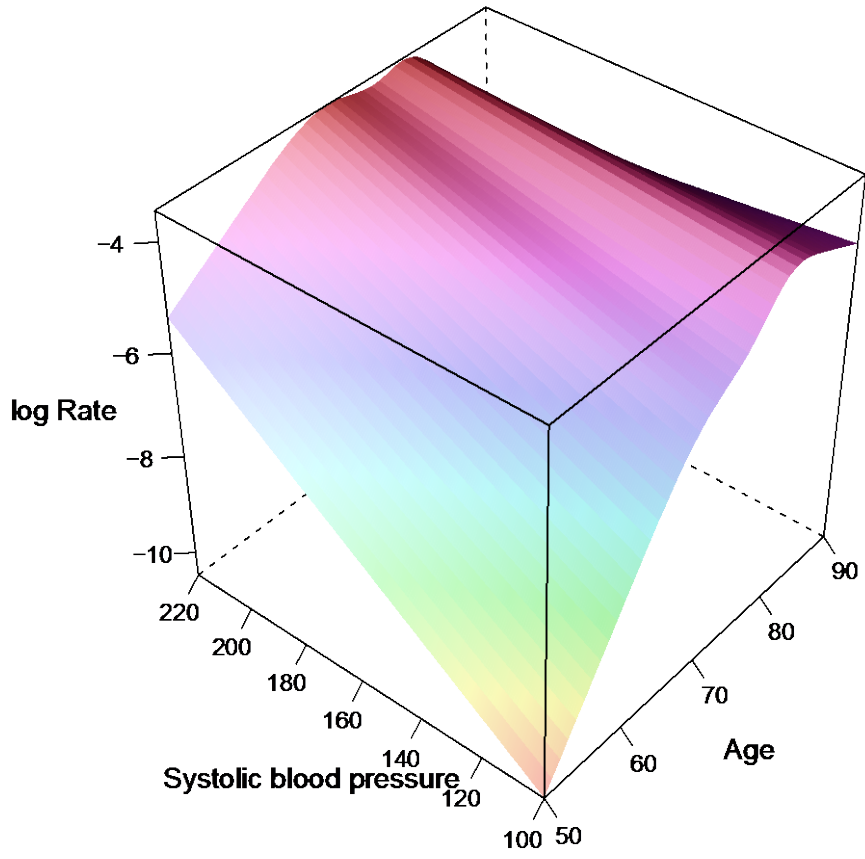

$P_{\text{interaction}} = 0.439$

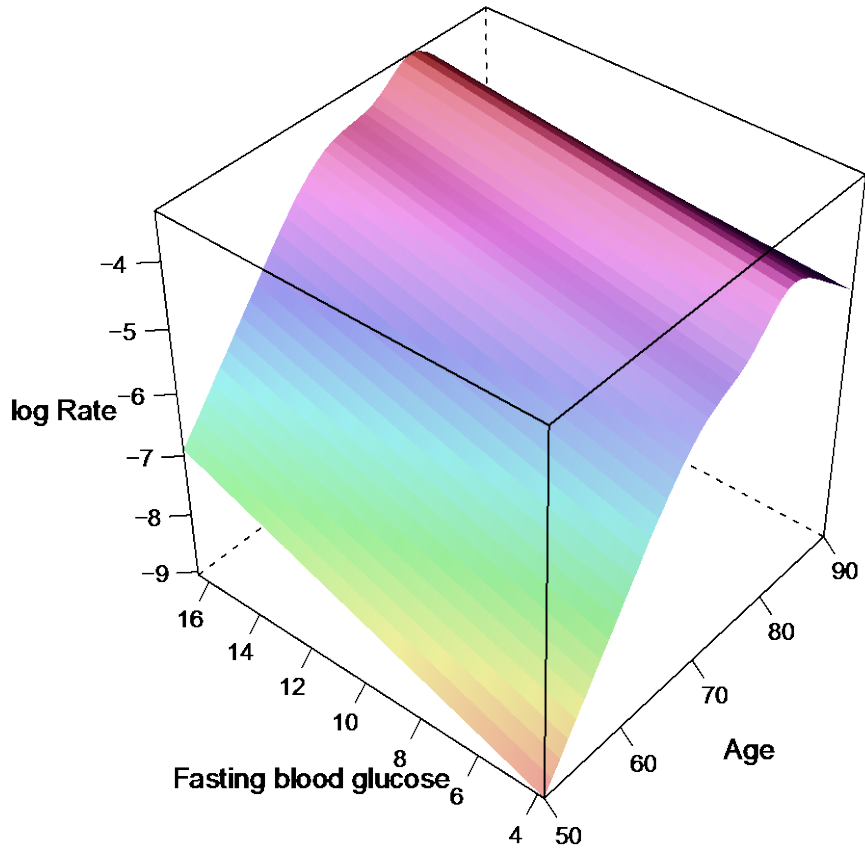

**Figure S3.** 3D graphs illustrating the impact of the different risk factors and age on the log incident rate of heart failure. The p-values for the interaction term between those risk factors and age regarding heart failure are given in the figures.

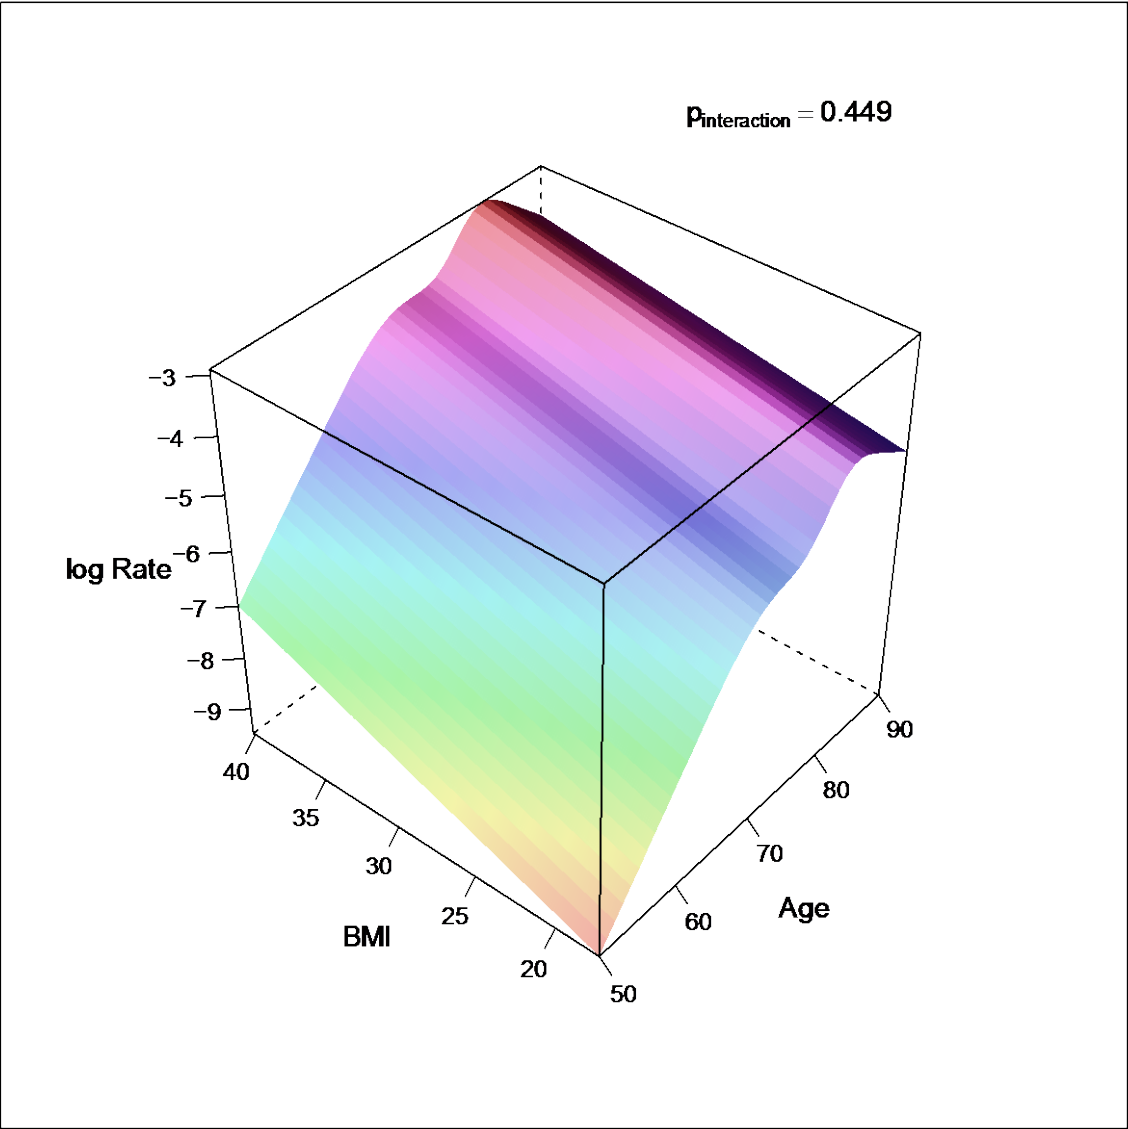



$P_{\text{interaction}} = 0.829$

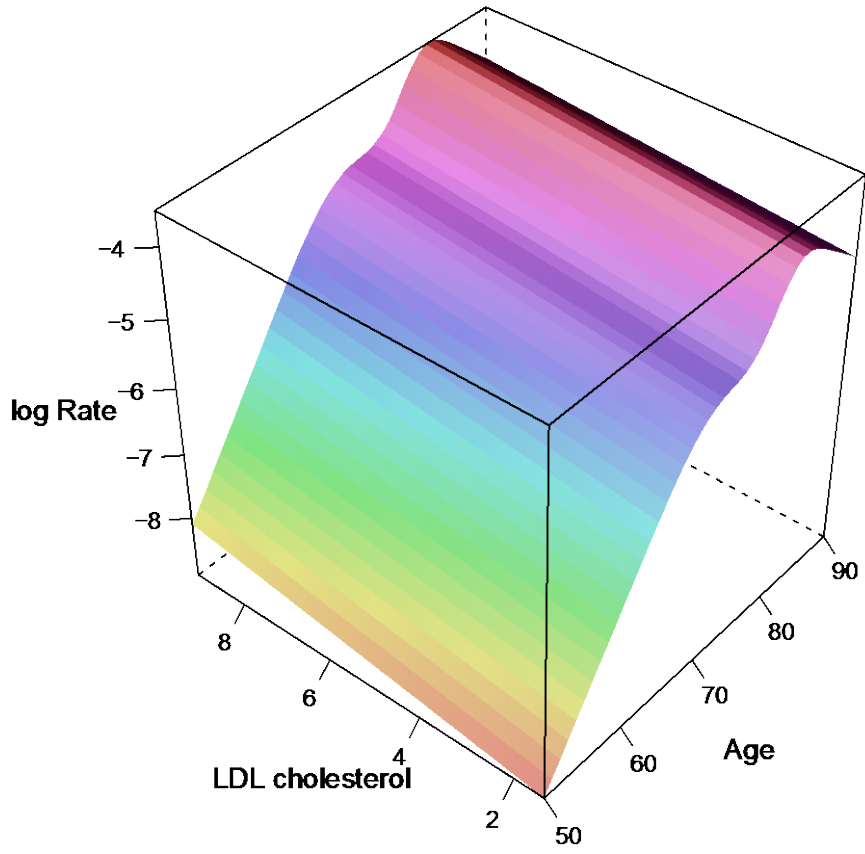

$P_{\text{interaction}} = 0.016$

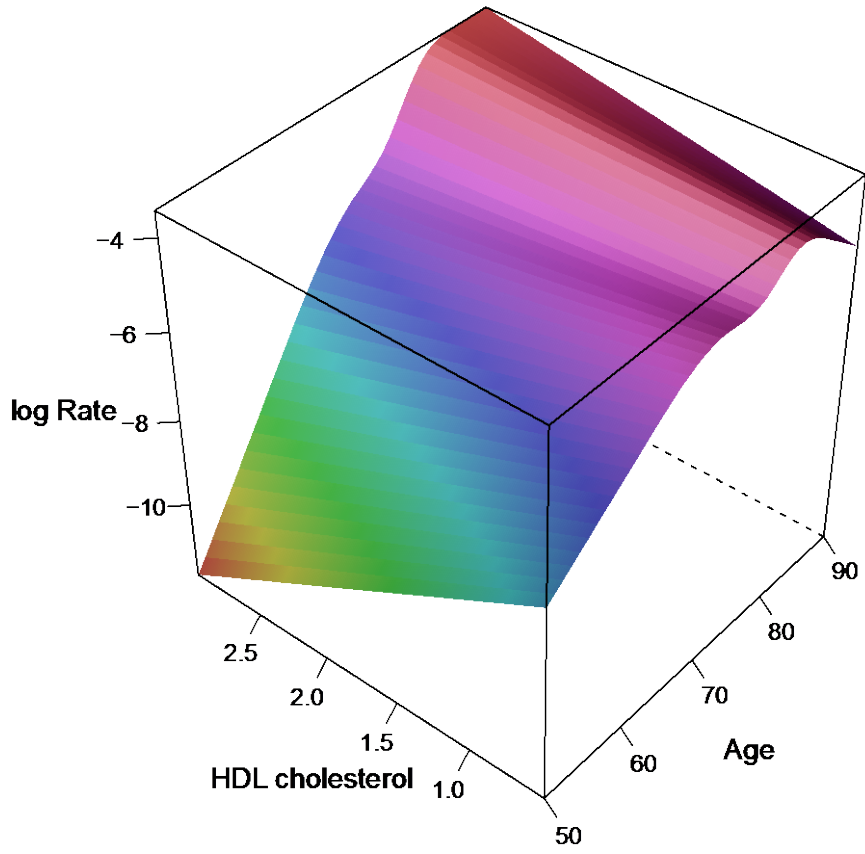

$P_{\text{interaction}} = 0.004$

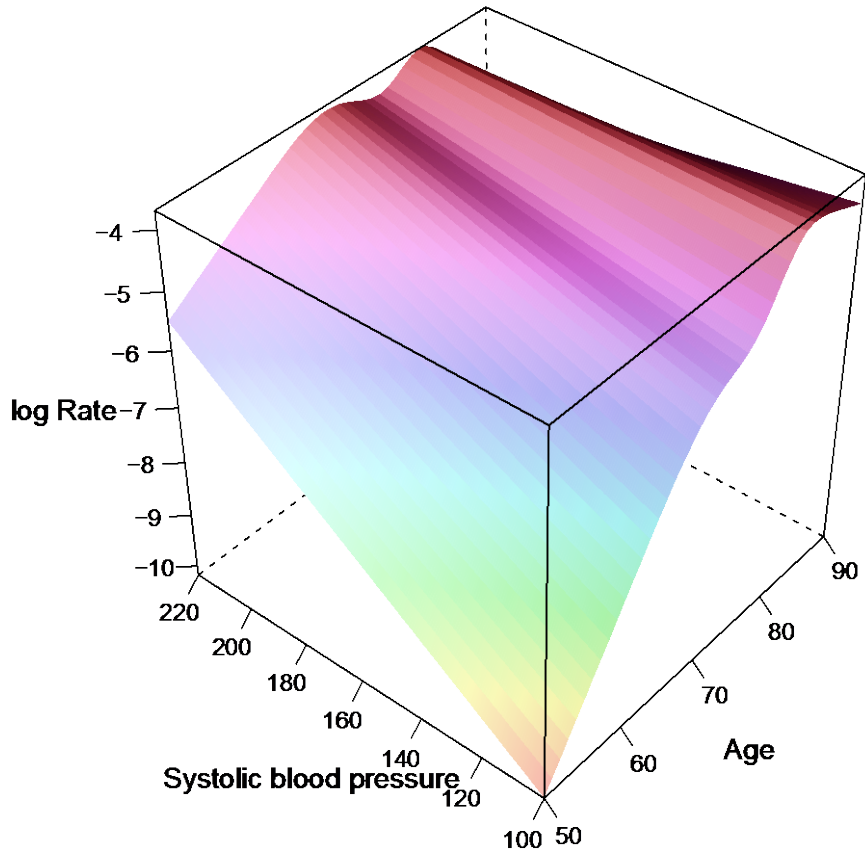

$P_{\text{interaction}} = 0.874$

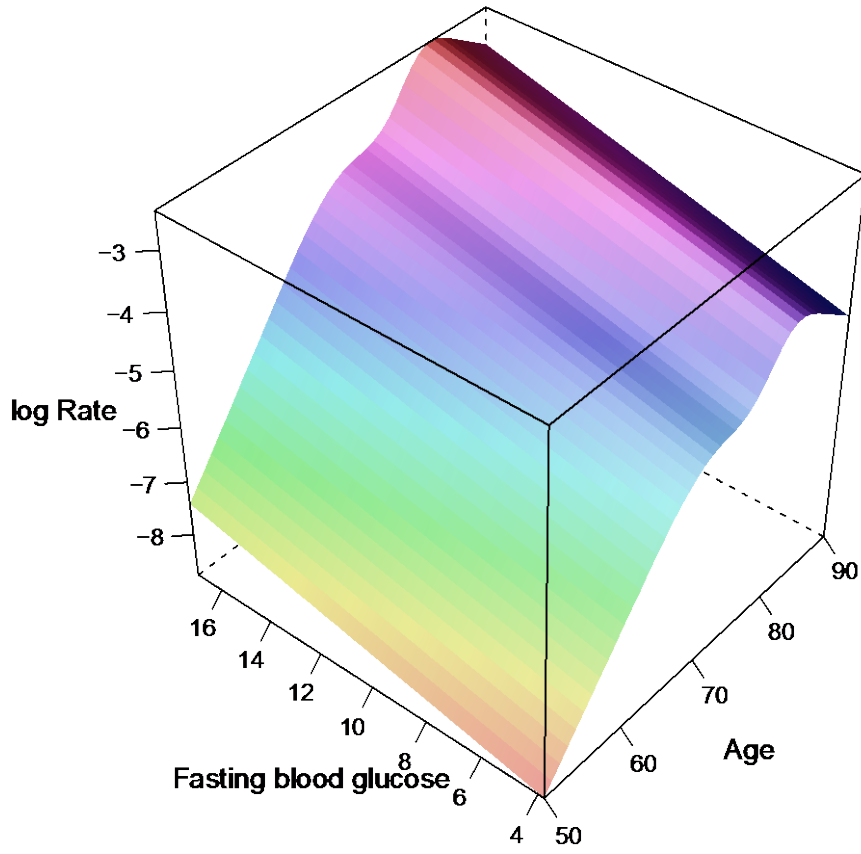

Supplement: JAH3-7-e007061-s001.pdf [file JAH3-7-e007061-s001.pdf]
